# Supplementary material for: Viper Venom Phospholipase A2 Database: The Structural and Functional Anatomy of a Primary Toxin in Envenomation
Source: MDPI journal article supplement (doi:10.3390/toxins16020071), 2024-02-01
Supplement: s1 [file s1]

# Supplementary Materials: Viper Venom Phospholipase A2 Database: The Structural and Functional Anatomy of a Primary Toxin in Envenomation

Ana L. Novo de Oliveira, Miguel T. Lacerda, Maria J. Ramos and Pedro A. Fernandes

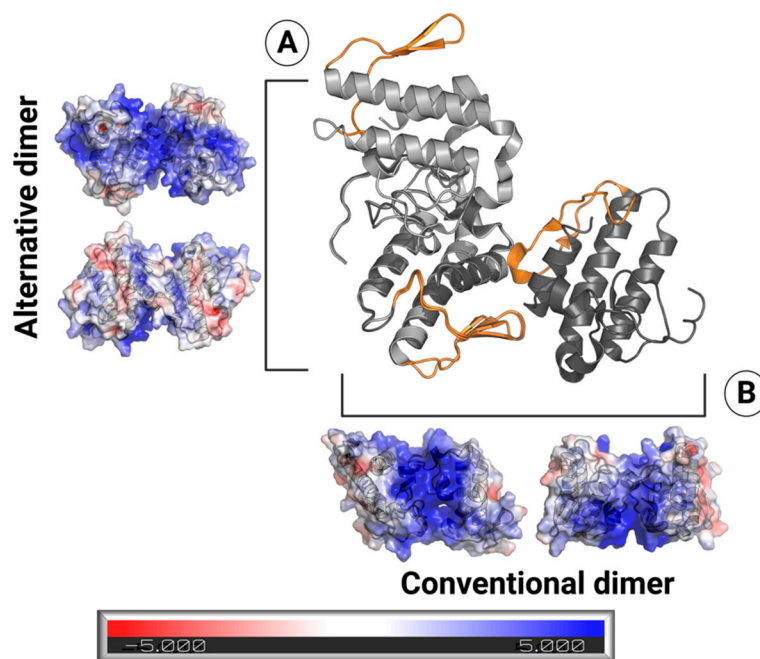

**Figure S1.** Two possible dimerization interfaces of vvPLA2: **(A)** The compact dimer. **(B)** The extended dimer. The right and bottom parts of the figure show the electrostatic potential projected over the molecular surface of the dimer from two different perspectives (bar units:  $k_B T/e^-$ ). The electrostatic surface was calculated with the APBS electrostatics plugin for Pymol 2.0, using default parameters<sup>1</sup>. The figure shows clearly that the positively charged residues are predominant on one side of the dimer in the case of the compact dimer conformation, compatible with the membrane association, and buried in the dimer interface in the extended dimer. Lastly, the electrostatic attraction with the negative phospholipid residues would only occur in a small region.

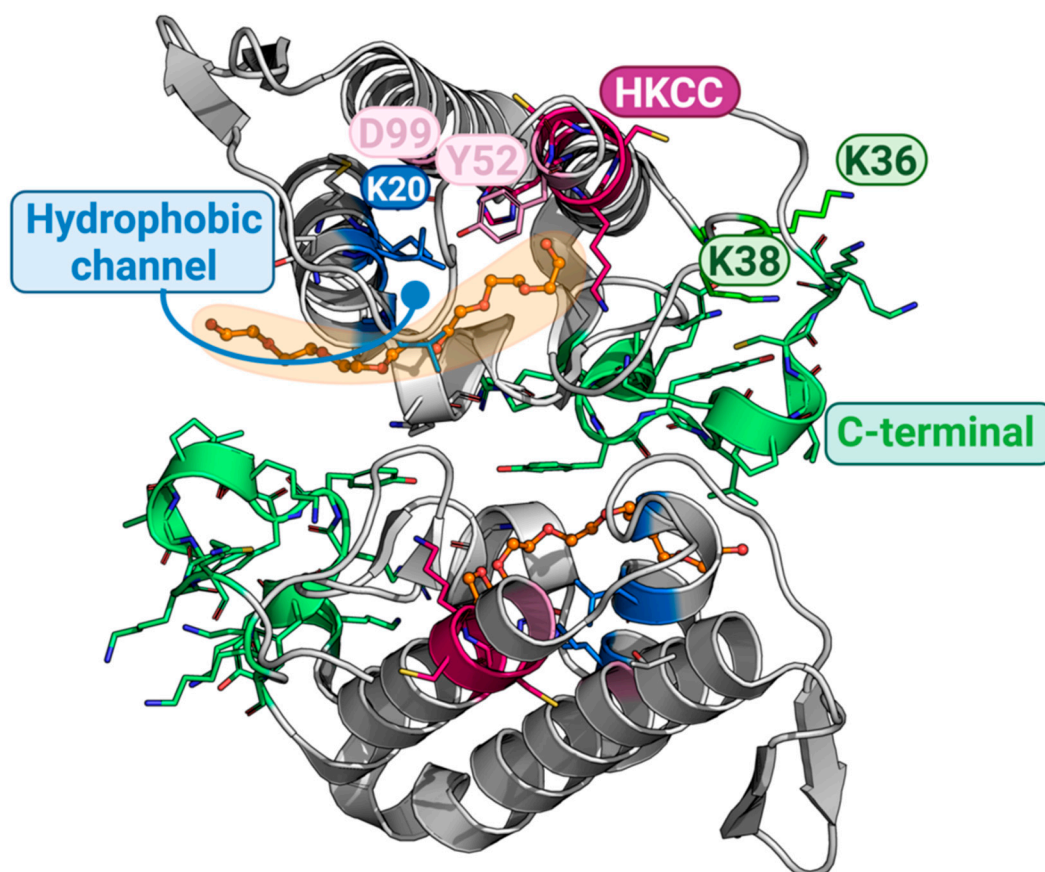

**Figure S2.** The three principal regions of the PLA2-like proteins. The figure shows the structure of the PDB—ID 1Y4L<sup>8</sup>, which was solved in the compact dimerization conformation. The N-terminal and the three principal residues (in sticks) that define the hydrophobic channel are shown in blue. The HKCC motif is represented in magenta, and the residues Y52 and D99 stabilize the H48 residues through an H-bond network. The K36 and K38 residues and the C-terminal segment 115-129 are the main ones responsible for the PLA2-like myotoxicity and are highlighted in green. Finally, in orange, we show an organic molecule that mimics the region that the phospholipid should occupy.

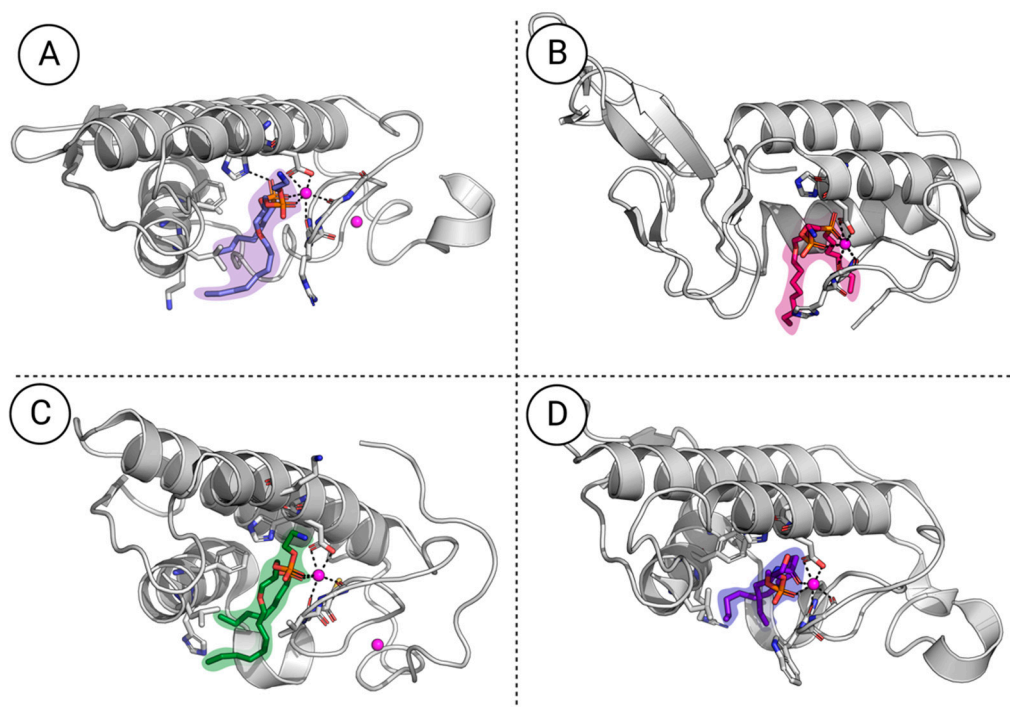

**Figure S3.** Phospholipase A2 bound to the transition-state analogs. The enzyme's secondary structure is represented in cartoon, and the residues that delimitate the ligands are shown as grey sticks. **(A)** The Indian cobra (*Naja naja*, PDB ID. 1POB<sup>10</sup>); **(B)** Human (PDB ID. 1POC<sup>11</sup>), **(C)** Bee (*Apis mellifera*,<sup>12</sup> PDB ID. 1POE); and **(D)** The wild-boar (*Sus scrofa*) PLA2 bound to substrate-derived inhibitor (PDB ID. 5P2P<sup>13</sup>).

### (A) Protein - membrane system

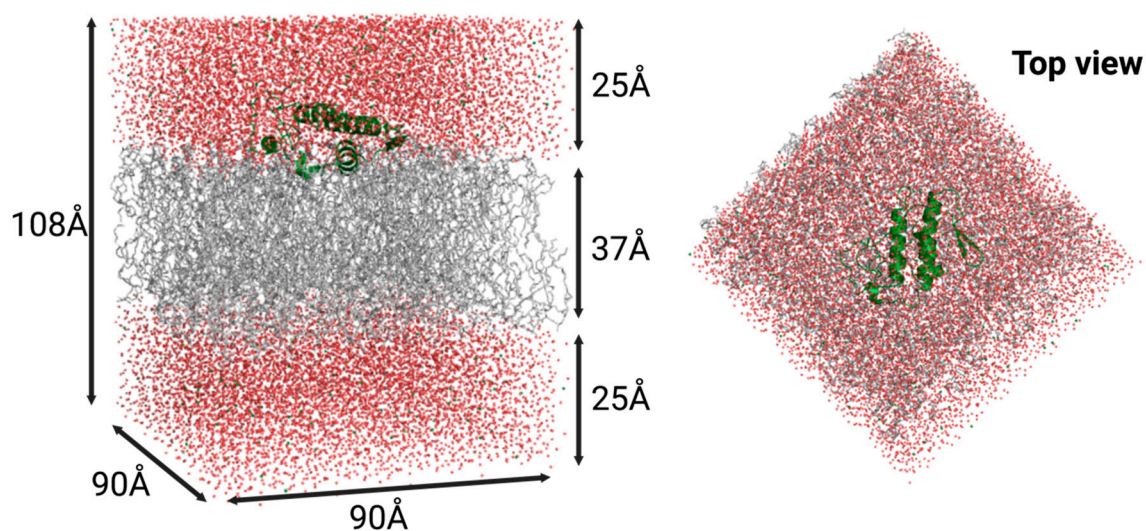

**Figure S4.** An acidic vvPLA2 from *E. carinatus* (PDB ID. 1OZ6, shown in the figure) and a *B. asper* PLA2-like protein (PDB ID. 1Y4L) were inserted in a POPS bilayer using the Charmm-Gui webserver. The membrane size ensures enough space for protein mobility (90 Å x 90 Å). Finally, the full system was then solvated in a water box (TIP3P water model) with a thickness of 25 Å.

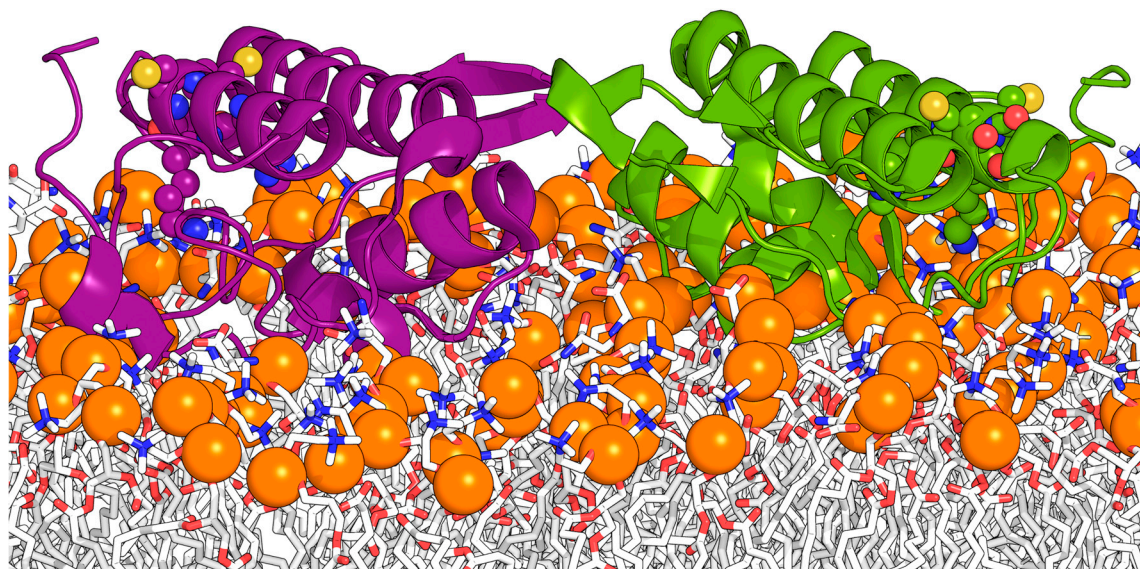

**Figure S5.** Modulation of the PLA2-like from *B. pauloensis*, which adopts an extended dimer conformation, bound to the membrane. (PDB ID. 1PA0<sup>2</sup>).



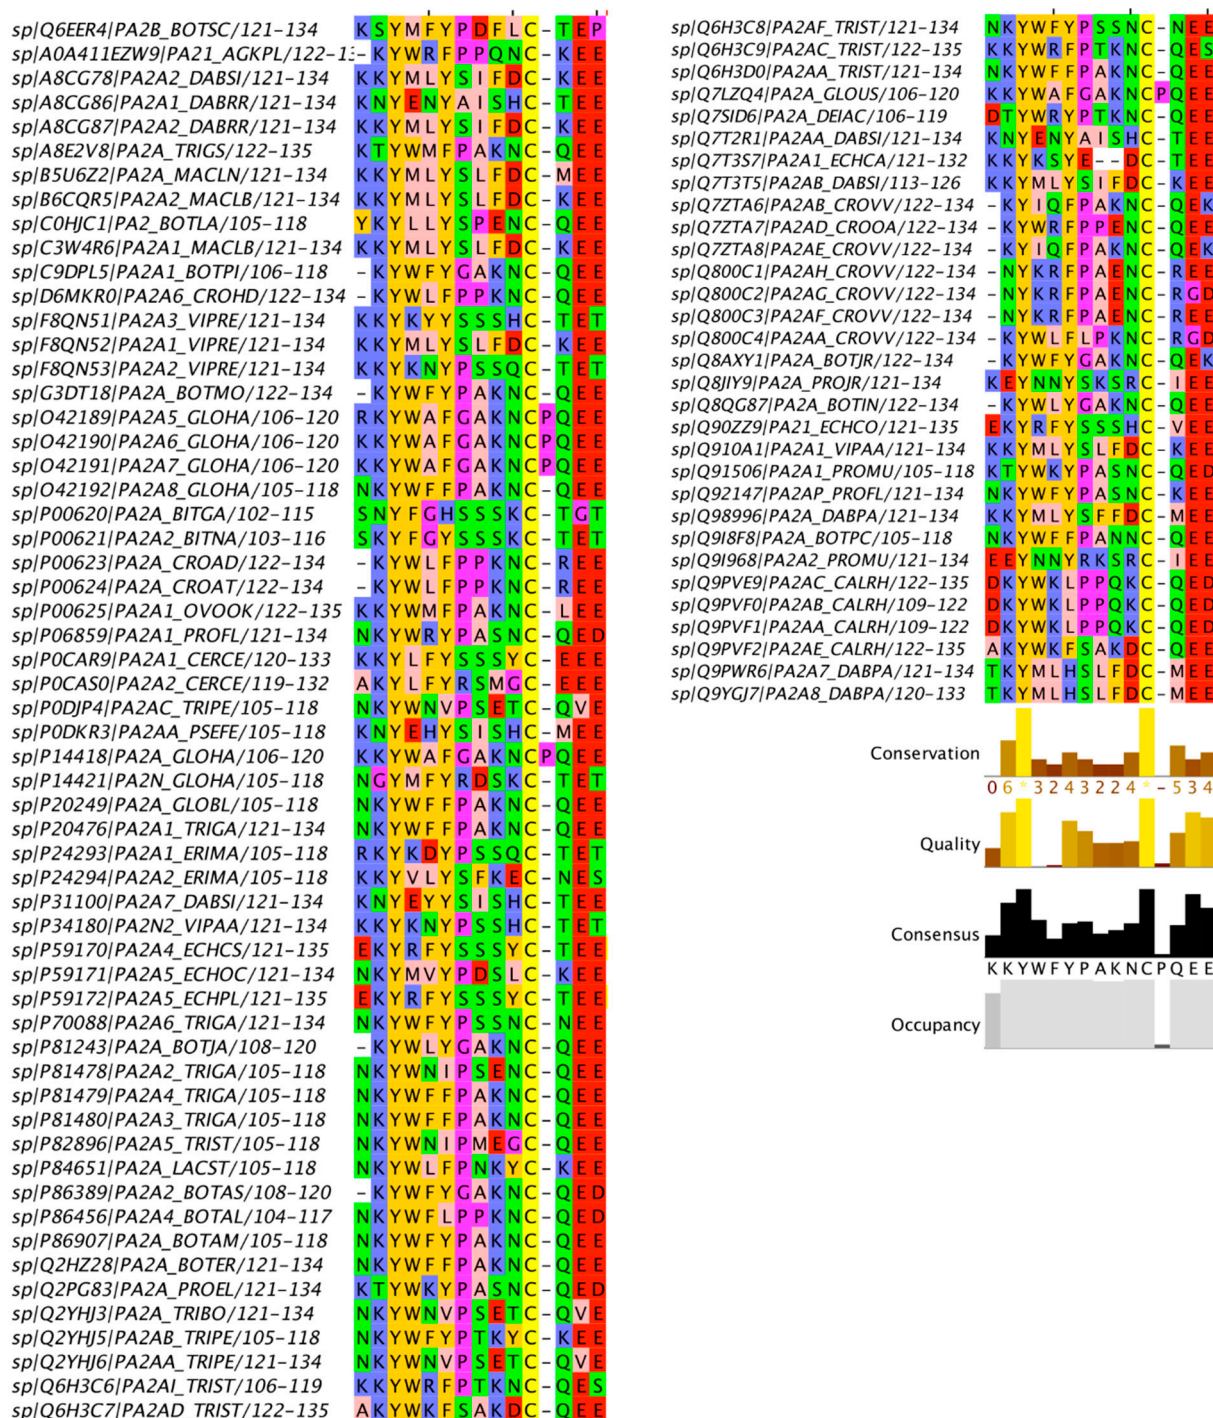

**Figure S6.** C-terminal sequence analysis of the vvPLA2 acidic subgroup. Amino acid sequence of the C-terminal region (residues 115 to 129). The residues were colored according to their physicochemical properties using the Zappo default coloring range as implemented in JalView. Hydrophobic residues in salmon; aromatic residues in orange; positively and negatively charged residues in blue and red, respectively; hydrophilic in green; Pro and Gly in magenta; and cysteines in yellow. Each figure also indicates the consensus sequence (most frequent residues) and the residues occupancy (presence or absence of gaps).

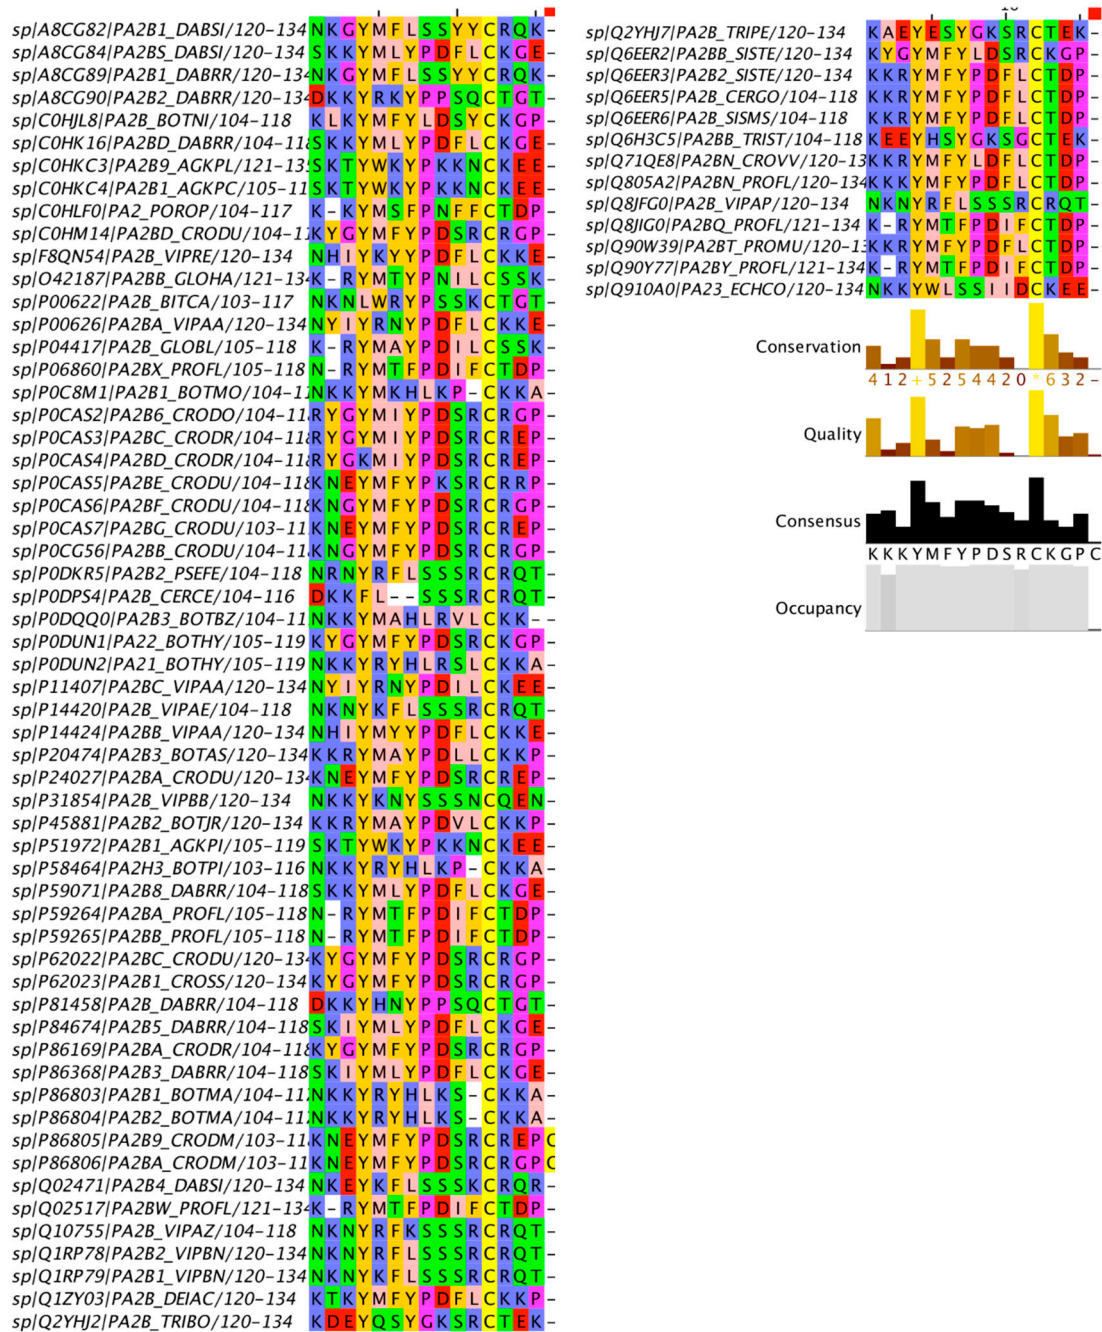

**Figure S7.** C-terminal sequence analysis of the vvPLA2 basic subgroup. Aminoacid sequence of the C-terminal region (residues 115 to 129). The residues were colored according to their physicochemical properties using the Zappo default coloring range as implemented in JalView. Hydrophobic residues in salmon; aromatic residues in orange; positively and negatively charged residues in blue and red, respectively; hydrophilic in green; Pro and Gly in magenta; and cysteines in yellow. Each figure also indicates the consensus sequence (most frequent residues) and the residues occupancy (presence or absence of gaps).



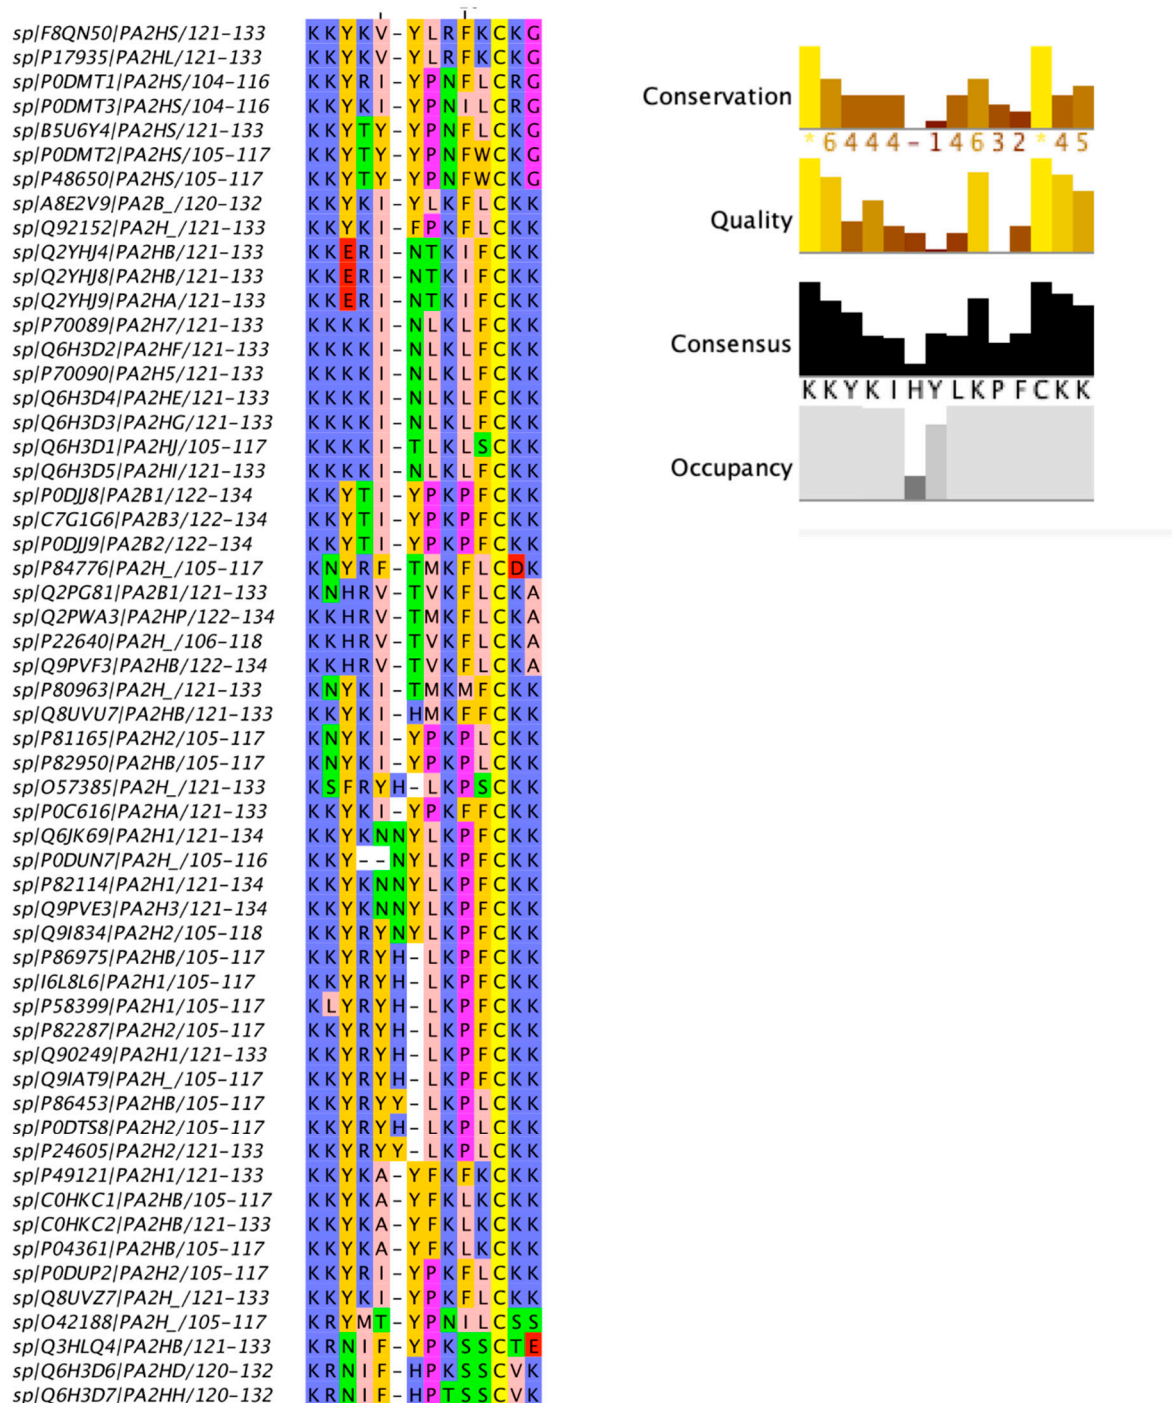

**Figure S8.** C-Terminal sequence analysis of the PLA2-like subgroup. Amino acid sequence of the C-terminal region (residues 115 to 129). The residues were colored according to their physicochemical properties using the Zappo default coloring range as implemented in JalView. Hydrophobic residues in salmon; aromatic residues in orange; positively and negatively charged residues in blue and red, respectively; hydrophilic in green; Pro and Gly in magenta; and cysteines in yellow. Each figure also indicates the consensus sequence (most frequent residues) and the residues occupancy (presence or absence of gaps).

**Table S1.** Surface area of seven dimeric vvPLA2 and PLA2-like proteins and their interface area (buried surface area upon dimerization), calculated as:

$$\text{Buried Area} = (\text{Area}_{\text{Chain A}} + \text{Area}_{\text{Chain B}}) - \text{Dimer Area}_{\text{Total}}$$

The areas were computed using the GETAREA<sup>1</sup> webserver (<https://curie.utmb.edu/getarea.html>). The standard deviation is also shown. All the areas are given in Å<sup>2</sup>.

| sPLA2         | Organism               | X-ray structure | Dimer Form | Total Area | Polar Area | Apolar Area | Chain A Area | Polar Area | Apolar Area | Chain B Area | Polar Area | Apolar Area | Burried Area | AVERAGE | STD |
|---------------|------------------------|-----------------|------------|------------|------------|-------------|--------------|------------|-------------|--------------|------------|-------------|--------------|---------|-----|
| PLA2-like     | <i>B. pauloensis</i>   | 1PA0            | Extended   | 12952      | 4621       | 8330        | 7061         | 2477       | 4584        | 6913         | 2493       | 4419        | 1022         | 868     | 132 |
| PLA2-like     | <i>B. jararaccussu</i> | 3JR8            | Extended   | 12986      | 4520       | 8465        | 6787         | 2259       | 4528        | 7084         | 2602       | 4482        | 885          |         |     |
| Basic vvPLA2  | <i>A. halys pallas</i> | 1JIA            | Extended   | 13584      | 4510       | 9074        | 7087         | 2381       | 4705        | 7195         | 2433       | 4762        | 698          |         |     |
| PLA2-like     | <i>B. pauloensis</i>   | 5VFH            | Compact    | 12071      | 4392       | 7678        | 6847         | 2270       | 4576        | 6715         | 2246       | 4468        | 1491         | 1393    | 163 |
| Basic vvPLA2  | <i>B. asper</i>        | 5TFV            | Compact    | 12140      | 4287       | 7853        | 6834         | 2315       | 4518        | 6664         | 2082       | 4582        | 1358         |         |     |
| Acidic vvPLA2 | <i>B. jararaccussu</i> | 1Z76            | Compact    | 13929      | 5920       | 8008        | 7833         | 3124       | 4748        | 7676         | 2989       | 4686        | 1580         |         |     |
| PLA2-like     | <i>B. asper</i>        | 1Y4L            | Compact    | 12933      | 4877       | 8055        | 7050         | 2518       | 4531        | 7028         | 2526       | 4501        | 1145         |         |     |
| Pancreatic    | Porcine                | 1FXF            | Compact    | 12868      | 5245       | 7623        | 7156         | 2817       | 4338        | 7255         | 2895       | 4360        | 1543         |         |     |

PDB IDs.: 1PAO<sup>2</sup>, 3JR8<sup>3</sup>, 1JIA<sup>4</sup>, 5VFH<sup>5</sup>, 5TFV<sup>6</sup>, 1Z76<sup>7</sup>, 1Y4L<sup>8</sup> and 1FXF<sup>9</sup>.



**Table S2.** Validation of the molecular modeling protocol for vvPLA2 as a function of the template quality. To estimate the sequence identity threshold of the template necessary to obtain accurate 3D structures using our homology modeling method, we tried to reproduce known X-ray structures by applying templates with High-Quality (sequence id. > 70%), Good-Quality (sequence id. = 55-70%), or Medium-Quality classes (sequence id. < 55%). The software Modeler provides the DOPE score; The Interaction Score corresponds to the DOPE score divided by the number of heavy atoms. The Prosa II score from the ProsaWeb Server (<https://prosa.services.came.sbg.ac.at/prosa.php>; Nucleic Acids Research, 2007, Vol.35, WebServer issue W407-W410).

| Species                              | Template Quality | Seq. length | Template Seq. ID | DOPE score | Interaction score | ProsaII score (Model) | ProsaII score (Template) | SS Bridges | RMSD backbone | PDB                |
|--------------------------------------|------------------|-------------|------------------|------------|-------------------|-----------------------|--------------------------|------------|---------------|--------------------|
| <i>Trimeresurus us stejnegeri</i>    | medium           | 121         | 44               | -1.12E+04  | -2.47E-02         | -5.61                 | -5.85                    | 5          | 1.58          | 4RFP <sup>14</sup> |
|                                      | good             | 121         | 55               | -1.19E+04  | -2.64E-02         | -6.15                 | -5.29                    | 7          | 1.11          |                    |
|                                      | good             | 121         | 69               | -1.17E+04  | -2.58E-02         | -5.51                 | -5.50                    | 7          | 0.98          |                    |
| <i>Vipera ammodytes meridionalis</i> | medium           | 122         | 44               | -1.09E+04  | -2.40E-02         | -4.86                 | -7.54                    | 6          | 1.92          | 1JLT <sup>15</sup> |
|                                      | medium           | 122         | 45               | -1.13E+04  | -2.44E-02         | -4.75                 | -6.36                    | 6          | 1.58          |                    |
|                                      | medium           | 122         | 53               | -1.19E+04  | -2.65E-02         | -5.72                 | -4.91                    | 7          | 1.17          |                    |
|                                      | good             | 122         | 55               | -1.21E+04  | -2.61E-02         | -4.66                 | -4.13                    | 7          | 1.17          |                    |
|                                      | good             | 122         | 65               | -1.18E+04  | -2.63E-02         | -5.67                 | -4.13                    | 7          | 1.04          |                    |
|                                      | good             | 122         | 68               | -1.22E+04  | -2.63E-02         | -5.37                 | -5.47                    | 7          | 0.93          |                    |
|                                      | high             | 122         | 93               | -1.17E+04  | -2.60E-02         | -5.54                 | -5.29                    | 7          | 0.55          |                    |
| <i>Daboia russelii</i>               | high             | 122         | 92               | -1.21E+04  | -2.62E-02         | -5.52                 | -5.03                    | 7          | 0.34          | 1OXL <sup>16</sup> |
|                                      | medium           | 121         | 43               | -1.08E+04  | -2.42E-02         | -4.60                 | -5.85                    | 6          | 2.07          |                    |
|                                      | good             | 121         | 67               | -1.20E+04  | -2.70E-02         | -4.76                 | -2.93                    | 7          | 0.71          |                    |
| <i>Echis carinatus</i>               | high             | 121         | 93               | -1.17E+04  | -2.64E-02         | -4.97                 | -4.80                    | 7          | 0.65          | 1OZ6 <sup>17</sup> |
|                                      | medium           | 120         | 44               | -1.04E+04  | -2.31E-02         | -4.85                 | -5.97                    | 5          | 2.31          |                    |
|                                      | good             | 120         | 55               | -1.15E+04  | -2.55E-02         | -4.75                 | -5.03                    | 7          | 1.23          |                    |
| <i>Gloydius halys</i>                | good             | 120         | 66               | -1.15E+04  | -2.54E-02         | -4.88                 | -5.29                    | 7          | 1.05          | 1B4W <sup>17</sup> |
|                                      | medium           | 122         | 45               | -1.03E+04  | -2.22E-02         | -4.99                 | -6.36                    | 6          | 3.19          |                    |
|                                      | good             | 122         | 55               | -1.13E+04  | -2.43E-02         | -5.10                 | -4.13                    | 7          | 1.14          |                    |
| <i>Daboia siamensis</i>              | good             | 122         | 69               | -1.17E+04  | -2.52E-02         | -5.03                 | -4.87                    | 7          | 0.52          | 2H4C <sup>18</sup> |
|                                      | medium           | 122         | 44               | -1.10E+04  | -2.47E-02         | -4.72                 | -5.85                    | 5          | 3.28          |                    |
|                                      | medium           | 122         | 44               | -1.17E+04  | -2.46E-02         | -5.02                 | -7.37                    | 6          | 1.67          |                    |
|                                      | medium           | 122         | 54               | -1.22E+04  | -2.74E-02         | -5.24                 | -4.91                    | 7          | 1.04          |                    |
|                                      | medium           | 122         | 54               | -1.25E+04  | -2.63E-02         | -5.48                 | -4.60                    | 7          | 1.41          |                    |
|                                      | high             | 122         | 70               | -1.23E+04  | -2.76E-02         | -5.24                 | -5.70                    | 7          | 0.90          |                    |
|                                      | medium           | 122         | 69               | -1.27E+04  | -2.67E-02         | -5.53                 | -5.03                    | 7          | 1.13          |                    |
|                                      | high             | 122         | 89               | -1.24E+04  | -2.80E-02         | -5.21                 | -5.29                    | 7          | 1.03          |                    |

**Table S3.** Validation of the molecular modeling protocol for PLA2-like proteins as a function of the template quality. To estimate the sequence identity threshold of the template necessary to obtain accurate 3D structures using our homology modeling method, we tried to reproduce known X-ray structures by applying templates with High-Quality (sequence id. > 70%), Good-Quality (sequence id. = 55-70%), or Medium-Quality classes (sequence id. < 55%). The DOPE score and Interaction score were calculated as in Table S2.

| Species                           | Chain   | Template Quality | Seq. length | Template Seq. ID | DOPE score | Interaction Score | ProsaII score | ProsaII Template | SS bridges | RMSD backbone | PDB                |
|-----------------------------------|---------|------------------|-------------|------------------|------------|-------------------|---------------|------------------|------------|---------------|--------------------|
| <i>Protobothrops flavoviridis</i> | A,B,C,D | good             | 122         | 55               | -1.17E+04  | -2.57E-02         | -5.5          | -4.66            | 7          | 1.23          | 6AL3 <sup>19</sup> |
|                                   |         | high             | 122         | 64               | -1.15E+04  | -2.51E-02         | -5.46         | -5.14            | 7          | 1.27          |                    |
|                                   |         | high             | 122         | 80               | -1.17E+04  | -2.55E-02         | -5.24         | -5.2             | 7          | 1.04          |                    |
| <i>Bothrops moojeni</i>           | A,B     | medium           | 122         | 54               | -1.13E+04  | -2.46E-02         | -5.74         | -4.78            | 7          | 1.51          | 1XXS <sup>20</sup> |
|                                   |         | good             | 122         | 69               | -1.12E+04  | -2.45E-02         | -5.31         | -5.06            | 7          | 1.45          |                    |
|                                   |         | high             | 122         | 99               | -1.17E+04  | -2.55E-02         | -5.46         | -5.56            | 7          | 0.72          |                    |
|                                   | A       | good             | 121         | 55               | -1.17E+04  | -2.57E-02         | -5.77         | -4.13            | 7          | 1.16          |                    |

|                     |        |     |    |           |           |       |       |   |      |                    |
|---------------------|--------|-----|----|-----------|-----------|-------|-------|---|------|--------------------|
| <i>Atropoides</i>   | good   | 121 | 67 | -1.16E+04 | -2.56E-02 | -5.56 | -2.93 | 7 | 1.06 | 2AOZ <sup>2</sup>  |
| <i>s nummifer</i>   | high   | 121 | 91 | -1.18E+04 | -2.60E-02 | -5.4  | -5.63 | 7 | 0.74 | <sup>1</sup>       |
| <i>Cerrophidion</i> | good   | 121 | 55 | -1.20E+04 | -2.66E-02 | -6.05 | -6.41 | 7 | 0.97 | 1GOD <sup>2</sup>  |
| <i>godmani</i>      | good   | 121 | 64 | -1.17E+04 | -2.59E-02 | -5.70 | -4.93 | 7 | 1.11 | <sup>2</sup>       |
|                     | high   | 121 | 91 | -1.20E+04 | -2.66E-02 | -5.6  | -5.1  | 7 | 1.15 |                    |
| <i>Bothrops</i>     | medium | 121 | 55 | -1.12E+04 | -2.46E-02 | -6.04 | -5.35 | 7 | 1.38 |                    |
| <i>pirajai</i>      | good   | 121 | 62 | -1.10E+04 | -2.41E-02 | -5.91 | -4.93 | 7 | 1.46 | 2Q2J <sup>22</sup> |
|                     | high   | 121 | 99 | -1.14E+04 | -2.49E-02 | -5.45 | -5.2  | 7 | 1.06 |                    |
| <i>Bothrops</i>     | medium | 121 | 55 | -1.14E+04 | -2.51E-02 | -5.83 | -5.29 | 7 | 1.09 |                    |
| <i>asper</i>        | good   | 121 | 63 | -1.12E+04 | -2.47E-02 | -5.82 | -4.93 | 7 | 1.22 | 1Y4L <sup>8</sup>  |
|                     | high   | 121 | 97 | -1.17E+04 | -2.58E-02 | -5.45 | -5.21 | 7 | 0.57 |                    |

**Table S4.** Comparison between the homology modelling models derived in this work and the AlphaFold<sup>23</sup> models. All the RMSD values are given in Å.

|           | PDB    | Ref. | RMSD between the models and the X-ray structures | RMSD between the AlphaFold and the X-ray structures | RMSD between the models and AlphaFold structures |
|-----------|--------|------|--------------------------------------------------|-----------------------------------------------------|--------------------------------------------------|
| vvPLA2    | 1B4W   | 17   | 0.4                                              | 0.3                                                 | 0.4                                              |
|           | 1JLT_A | 15   | 0.7                                              | 0.3                                                 | 0.6                                              |
|           | 1JLT_B | 15   | 0.3                                              | 0.3                                                 | 0.5                                              |
|           | 2H4C_A | 18   | 0.8                                              | 1.0                                                 | 0.7                                              |
|           | 2H4C_B | 18   | 0.7                                              | 0.8                                                 | 0.7                                              |
|           | 1OXL   | 24   | 0.5                                              | 0.5                                                 | 0.5                                              |
|           | 1OZ6   | 16   | 0.5                                              | 0.4                                                 | 0.5                                              |
|           | 4RFP   | 14   | 0.6                                              | 0.7                                                 | 0.6                                              |
| PLA2-like | 1XXS   | 20   | 0.4                                              | 0.6                                                 | 0.4                                              |
|           | 1GOD   | 25   | 0.8                                              | 0.7                                                 | 0.4                                              |
|           | 1Y4L   | 8    | 0.3                                              | 0.5                                                 | 0.4                                              |
|           | 2Q2J   | 22   | 0.3                                              | 0.4                                                 | 0.4                                              |
|           | 2AOZ   | 21   | 0.4                                              | 0.4                                                 | 0.4                                              |
|           | 6AL3   | 19   | 0.6                                              | 0.6                                                 | 0.4                                              |

**Table S5. All homology models vs AlphaFold2 structures.** We have calculated the RMSD metrics between our modeled structures and the AlphaFold predicted models. Overall, both modeled structures present an RMSD lower than 1 Å, a value within the range of experimental errors associated with many X-ray structures. However, we found exceptions (highlighted in yellow); A close inspection revealed that loop conformations are responsible for such high values.

| Acidic vvPLA2 |      | Basic VVPLA2 |            | PLA2-like Proteins |            |
|---------------|------|--------------|------------|--------------------|------------|
| UniProt Code  | RMSD | UniProt Code | RMSD       | UniProt Code       | RMSD       |
| A8CG78        | 0.8  | A8CG82       | 0.7        | A0A1S5XW05         | 0.5        |
| A8CG86        | 0.8  | A8CG84       | 0.7        | B5U6Y4             | 0.5        |
| A8CG87        | 0.8  | A8CG89       | 0.7        | C0HKC1             | 0.4        |
| A8E2V8        | 0.6  | A8CG90       | 0.5        | C0HKC2             | 0.5        |
| B5U6Z2        | 0.8  | C0HK16       | 0.7        | F8QN50             | 0.6        |
| B6CQR5        | 0.9  | C0HKC3       | 0.6        | O42188             | 0.3        |
| C0HJC1        | 0.5  | C0HKC4       | 0.6        | P0C616             | 0.5        |
| C3W4R6        | 0.7  | C0HLF0       | <b>2.2</b> | P0DKU1             | 0.5        |
| C9DPL5        | 0.6  | C7G1G6       | 1.7        | P0DMT1             | <b>4.5</b> |
| D0UGJ0        | 0.9  | F8QN54       | 0.6        | P0DMT2             | 0.5        |
| D6MKR0        | 0.7  | O42187       | 0.5        | P0DMT3             | <b>4.4</b> |
| F8QN51        | 0.7  | P00622       | <b>4.8</b> | P0DUN6             | <b>8.7</b> |

|        |            |        |            |        |     |
|--------|------------|--------|------------|--------|-----|
| F8QN52 | 0.73       | P00626 | 0.6        | P0DUN7 | 0.4 |
| F8QN53 | 0.6        | P04417 | 0.6        | P22640 | 0.9 |
| O42189 | 0.4        | P06860 | 0.6        | P70089 | 0.5 |
| O42190 | 0.4        | P0C8M1 | <b>2.7</b> | P70090 | 0.5 |
| O42191 | 0.3        | P0CAS3 | 0.6        | P80963 | 0.5 |
| O42192 | 0.6        | P0CAS4 | 0.8        | P82950 | 0.4 |
| P00620 | <b>7.0</b> | P0CAS5 | 0.8        | P86453 | 0.5 |
| P00621 | <b>7.0</b> | P0CAS6 | 0.7        | P86975 | 0.4 |
| P00623 | 0.7        | P0CAS7 | <b>4.9</b> | Q2PWA3 | 0.6 |
| P00624 | 0.7        | P0DKR5 | 0.9        | Q2YHJ4 | 0.7 |
| P00625 | 0.6        | P0DPS4 | 0.6        | Q2YHJ8 | 0.7 |
| P06859 | 1.2        | P0DQQ0 | 1.1        | Q2YHJ9 | 0.8 |
| P0CAR9 | <b>2.8</b> | P0DUN1 | 1.6        | Q3HLQ4 | 0.6 |
| P0CAS0 | <b>3.7</b> | P0DUN2 | <b>4.3</b> | Q6EAN6 | 0.8 |
| P0DKR3 | 0.8        | P11407 | 0.6        | Q6H3D1 | 0.5 |
| P14418 | 0.4        | P14420 | 0.7        | Q6H3D2 | 0.8 |
| P20249 | 0.6        | P14424 | 0.6        | Q6H3D3 | 0.5 |
| P20476 | 0.6        | P20474 | 0.7        | Q6H3D4 | 0.5 |
| P21789 | 0.6        | P31854 | 0.8        | Q6H3D5 | 0.5 |
| P24293 | 0.5        | P51972 | 0.5        | Q6H3D6 | 1.8 |
| P24294 | 0.7        | P59071 | 0.7        | Q6JK69 | 0.5 |
| P31100 | 0.8        | P59264 | 0.6        | Q8UVU7 | 0.5 |
| P59170 | 0.8        | P59265 | 0.5        | Q8UVZ7 | 0.5 |
| P59171 | 0.7        | P62023 | 0.8        | Q92152 | 0.7 |
| P59172 | 0.7        | P81458 | 0.6        | Q9PVE3 | 0.4 |
| P70088 | 0.7        | P84674 | 0.7        | Q9PVF3 | 1.2 |
| P81243 | <b>2.8</b> | P86169 | 0.8        | Q9PVF4 | 0.6 |
| P81478 | 0.7        | P86368 | 0.6        |        |     |
| P81479 | 0.5        | P86803 | <b>2.8</b> |        |     |
| P81480 | 0.5        | P86804 | <b>2.7</b> |        |     |
| P82896 | 0.5        | P86805 | <b>4.5</b> |        |     |
| P84651 | 0.6        | P86806 | <b>4.4</b> |        |     |
| P86389 | <b>3.0</b> | Q02471 | 0.7        |        |     |
| P86456 | <b>4.9</b> | Q02517 | 0.7        |        |     |
| P86907 | 0.7        | Q10755 | 0.8        |        |     |
| Q2HZ28 | 0.6        | Q1RP78 | 0.7        |        |     |
| Q2PG83 | 1.2        | Q1RP79 | 0.8        |        |     |
| Q2YHJ3 | 0.6        | Q1ZY03 | 0.6        |        |     |
| Q2YHJ5 | 0.7        | Q2PG81 | 0.6        |        |     |
| Q2YHJ6 | 0.7        | Q2YHJ2 | 0.7        |        |     |
| Q6H3C6 | 0.4        | Q2YHJ7 | 0.8        |        |     |
| Q6H3C7 | 0.7        | Q6EER2 | 0.9        |        |     |
| Q6H3C8 | 0.7        | Q6EER3 | 0.7        |        |     |
| Q6H3C9 | 0.5        | Q6EER4 | 0.7        |        |     |
| Q6H3D0 | 0.6        | Q6EER5 | 0.6        |        |     |
| Q7LZQ4 | 0.4        | Q6EER6 | 0.6        |        |     |
| Q7SID6 | 0.4        | Q6H3C5 | 0.6        |        |     |
| Q7T2R1 | 0.8        | Q71QE8 | 0.7        |        |     |
| Q7T3S7 | 0.5        | Q805A2 | 0.7        |        |     |
| Q7ZTA6 | 0.5        | Q8JFG0 | 0.9        |        |     |
| Q7ZTA7 | 0.5        | Q8JIG0 | 0.6        |        |     |



|        |            |        |     |
|--------|------------|--------|-----|
| Q7ZTA8 | 0.6        | Q90W39 | 0.7 |
| Q800C1 | 0.6        | Q90Y77 | 0.6 |
| Q800C2 | 0.6        |        |     |
| Q800C3 | 0.6        |        |     |
| Q800C4 | 0.7        |        |     |
| Q8AXY1 | 0.8        |        |     |
| Q8JIY9 | 0.6        |        |     |
| Q8QG87 | 0.7        |        |     |
| Q910A1 | 0.8        |        |     |
| Q91506 | 1.3        |        |     |
| Q92147 | 0.7        |        |     |
| Q98996 | 0.9        |        |     |
| Q9I8F8 | 0.6        |        |     |
| Q9I968 | 0.5        |        |     |
| Q9PVE9 | 0.5        |        |     |
| Q9PVF2 | 0.7        |        |     |
| Q9PWR6 | 0.7        |        |     |
| Q9YGJ7 | <b>4.6</b> |        |     |

**Table S6. i-face qualification and quantification contacts.** Here we present the number of contacts and the nature of the residues involved in the protein-membrane interface.

| IPROT CODE | Protein classification | Hydrophobic | Semipolar | Polar | Positively charged | Negatively charged | Total |
|------------|------------------------|-------------|-----------|-------|--------------------|--------------------|-------|
| A8CG78     | Catalytic acidic       | 10          | 1         | 11    | 2                  | 2                  | 26    |
| A8CG86     | Catalytic acidic       | 11          | 1         | 10    | 3                  | 2                  | 27    |
| A8CG87     | Catalytic acidic       | 10          | 1         | 11    | 2                  | 2                  | 26    |
| B5U6Z2     | Catalytic acidic       | 10          | 1         | 9     | 3                  | 3                  | 26    |
| B6CQR5     | Catalytic acidic       | 11          | 1         | 11    | 2                  | 2                  | 27    |
| C0HJC1     | Catalytic acidic       | 11          | 1         | 7     | 4                  | 4                  | 27    |
| C3W4R6     | Catalytic acidic       | 10          | 1         | 10    | 3                  | 3                  | 27    |
| C9DPL5     | Catalytic acidic       | 10          | 0         | 7     | 7                  | 2                  | 26    |
| D0UGJ0     | Catalytic acidic       | 9           | 1         | 9     | 4                  | 3                  | 26    |
| D6MKR0     | Catalytic acidic       | 10          | 0         | 7     | 4                  | 2                  | 23    |
| F8QN51     | Catalytic acidic       | 7           | 1         | 12    | 5                  | 2                  | 27    |
| F8QN52     | Catalytic acidic       | 13          | 0         | 9     | 3                  | 2                  | 27    |
| F8QN53     | Catalytic acidic       | 7           | 0         | 11    | 4                  | 2                  | 24    |
| O42189     | Catalytic acidic       | 11          | 1         | 5     | 6                  | 3                  | 26    |
| O42190     | Catalytic acidic       | 14          | 1         | 4     | 6                  | 3                  | 28    |
| O42191     | Catalytic acidic       | 12          | 1         | 5     | 5                  | 3                  | 26    |
| O42192     | Catalytic acidic       | 11          | 1         | 8     | 6                  | 2                  | 28    |
| P00620     | Catalytic acidic       | 8           | 0         | 15    | 5                  | 2                  | 30    |
| P00621     | Catalytic acidic       | 7           | 0         | 14    | 4                  | 4                  | 29    |
| P00623     | Catalytic acidic       | 11          | 0         | 8     | 4                  | 1                  | 24    |
| P00624     | Catalytic acidic       | 11          | 0         | 9     | 3                  | 2                  | 25    |
| P00625     | Catalytic acidic       | 11          | 1         | 8     | 4                  | 2                  | 26    |
| P06859     | Catalytic acidic       | 11          | 1         | 9     | 6                  | 1                  | 28    |
| P0CAR9     | Catalytic acidic       | 8           | 2         | 11    | 6                  | 2                  | 29    |
| P0CAS0     | Catalytic acidic       | 10          | 2         | 7     | 5                  | 1                  | 25    |
| P0DJP4     | Catalytic acidic       | 9           | 1         | 8     | 6                  | 3                  | 27    |
| P0DKR3     | Catalytic acidic       | 9           | 1         | 11    | 1                  | 3                  | 25    |
| P14418     | Catalytic acidic       | 14          | 1         | 5     | 4                  | 3                  | 27    |

|        |                  |    |   |    |   |   |    |
|--------|------------------|----|---|----|---|---|----|
| P20249 | Catalytic acidic | 11 | 1 | 7  | 4 | 3 | 26 |
| P20476 | Catalytic acidic | 9  | 1 | 7  | 4 | 3 | 24 |
| P21789 | Catalytic acidic | 6  | 1 | 11 | 7 | 4 | 29 |
| P24293 | Catalytic acidic | 8  | 1 | 10 | 5 | 2 | 26 |
| P24294 | Catalytic acidic | 11 | 1 | 10 | 3 | 1 | 26 |
| P31100 | Catalytic acidic | 9  | 0 | 10 | 2 | 3 | 24 |
| P59170 | Catalytic acidic | 9  | 1 | 11 | 6 | 1 | 28 |
| P59171 | Catalytic acidic | 10 | 1 | 8  | 3 | 5 | 27 |
| P59172 | Catalytic acidic | 7  | 1 | 10 | 5 | 1 | 24 |
| P70088 | Catalytic acidic | 8  | 0 | 8  | 4 | 4 | 24 |
| P81243 | Catalytic acidic | 8  | 1 | 15 | 3 | 2 | 29 |
| P81478 | Catalytic acidic | 10 | 1 | 9  | 5 | 1 | 26 |
| P81479 | Catalytic acidic | 11 | 1 | 7  | 3 | 3 | 25 |
| P81480 | Catalytic acidic | 8  | 1 | 7  | 6 | 3 | 25 |
| P82896 | Catalytic acidic | 10 | 1 | 7  | 5 | 4 | 27 |
| P84651 | Catalytic acidic | 10 | 1 | 7  | 4 | 5 | 27 |
| P86389 | Catalytic acidic | 8  | 1 | 11 | 5 | 3 | 28 |
| P86456 | Catalytic acidic | 10 | 0 | 12 | 6 | 2 | 30 |
| P86907 | Catalytic acidic | 11 | 0 | 6  | 5 | 3 | 25 |
| Q2HZ28 | Catalytic acidic | 10 | 1 | 8  | 4 | 3 | 26 |
| Q2PG83 | Catalytic acidic | 11 | 1 | 10 | 7 | 1 | 30 |
| Q2YHJ3 | Catalytic acidic | 9  | 1 | 9  | 6 | 2 | 27 |
| Q2YHJ5 | Catalytic acidic | 9  | 1 | 10 | 4 | 5 | 29 |
| Q2YHJ6 | Catalytic acidic | 9  | 1 | 9  | 6 | 2 | 27 |
| Q6H3C6 | Catalytic acidic | 10 | 0 | 7  | 5 | 3 | 25 |
| Q6H3C7 | Catalytic acidic | 12 | 1 | 9  | 5 | 1 | 28 |
| Q6H3C8 | Catalytic acidic | 8  | 0 | 8  | 4 | 4 | 24 |
| Q6H3C9 | Catalytic acidic | 10 | 0 | 8  | 7 | 3 | 28 |
| Q6H3D0 | Catalytic acidic | 9  | 1 | 7  | 4 | 3 | 24 |
| Q7LZQ4 | Catalytic acidic | 13 | 1 | 5  | 4 | 3 | 26 |
| Q7SID6 | Catalytic acidic | 9  | 0 | 7  | 6 | 3 | 25 |
| Q7T2R1 | Catalytic acidic | 11 | 0 | 10 | 2 | 2 | 25 |
| Q7T3S7 | Catalytic acidic | 8  | 1 | 10 | 6 | 0 | 25 |
| Q7T3T5 | Catalytic acidic | 12 | 1 | 8  | 4 | 3 | 28 |
| Q7ZTA6 | Catalytic acidic | 10 | 1 | 11 | 4 | 2 | 28 |
| Q7ZTA7 | Catalytic acidic | 11 | 0 | 10 | 6 | 1 | 28 |
| Q7ZTA8 | Catalytic acidic | 11 | 0 | 11 | 4 | 1 | 27 |
| Q800C1 | Catalytic acidic | 11 | 0 | 10 | 6 | 1 | 28 |
| Q800C2 | Catalytic acidic | 13 | 1 | 9  | 6 | 1 | 30 |
| Q800C3 | Catalytic acidic | 13 | 0 | 8  | 7 | 1 | 29 |
| Q800C4 | Catalytic acidic | 9  | 0 | 9  | 5 | 1 | 24 |
| Q8AXY1 | Catalytic acidic | 7  | 1 | 10 | 4 | 2 | 24 |
| Q8JIY9 | Catalytic acidic | 6  | 0 | 10 | 4 | 4 | 24 |
| Q8QG87 | Catalytic acidic | 6  | 1 | 11 | 5 | 2 | 25 |
| Q90ZZ9 | Catalytic acidic | 7  | 0 | 12 | 4 | 2 | 25 |
| Q910A0 | Catalytic acidic | 12 | 0 | 11 | 1 | 1 | 25 |
| Q910A1 | Catalytic acidic | 10 | 0 | 10 | 2 | 2 | 24 |
| Q91506 | Catalytic acidic | 11 | 1 | 10 | 8 | 0 | 30 |
| Q92147 | Catalytic acidic | 10 | 1 | 8  | 4 | 4 | 27 |
| Q98996 | Catalytic acidic | 10 | 2 | 12 | 3 | 3 | 30 |
| Q9I8F8 | Catalytic acidic | 9  | 1 | 7  | 5 | 3 | 25 |

|        |                  |    |   |    |   |   |    |
|--------|------------------|----|---|----|---|---|----|
| Q9I968 | Catalytic acidic | 6  | 0 | 12 | 4 | 5 | 27 |
| Q9PVE9 | Catalytic acidic | 9  | 0 | 9  | 5 | 2 | 25 |
| Q9PVF0 | Catalytic acidic | 11 | 1 | 9  | 6 | 1 | 28 |
| Q9PVF1 | Catalytic acidic | 11 | 0 | 9  | 6 | 2 | 28 |
| Q9PVF2 | Catalytic acidic | 12 | 1 | 9  | 5 | 1 | 28 |
| Q9PWR6 | Catalytic acidic | 10 | 1 | 10 | 2 | 3 | 26 |
| Q9YGJ7 | Catalytic acidic | 8  | 0 | 13 | 5 | 2 | 28 |
| Q6EER4 | Catalytic acidic | 9  | 1 | 9  | 5 | 4 | 28 |
| A8CG82 | Catalytic basic  | 12 | 1 | 9  | 5 | 3 | 30 |
| A8CG84 | Catalytic basic  | 8  | 1 | 7  | 7 | 6 | 29 |
| A8CG89 | Catalytic basic  | 9  | 1 | 11 | 5 | 2 | 28 |
| A8CG90 | Catalytic basic  | 8  | 0 | 11 | 6 | 1 | 26 |
| C0HK16 | Catalytic basic  | 7  | 1 | 6  | 8 | 4 | 26 |
| C0HKC3 | Catalytic basic  | 9  | 1 | 6  | 6 | 1 | 23 |
| C0HKC4 | Catalytic basic  | 10 | 1 | 6  | 7 | 1 | 25 |
| C0HLF0 | Catalytic basic  | 11 | 1 | 8  | 9 | 1 | 30 |
| F8QN54 | Catalytic basic  | 9  | 1 | 8  | 6 | 5 | 29 |
| O42187 | Catalytic basic  | 9  | 1 | 8  | 6 | 3 | 27 |
| P00622 | Catalytic basic  | 11 | 0 | 12 | 3 | 1 | 27 |
| P00626 | Catalytic basic  | 8  | 0 | 9  | 6 | 4 | 27 |
| P04417 | Catalytic basic  | 9  | 1 | 8  | 8 | 3 | 29 |
| P06860 | Catalytic basic  | 9  | 1 | 9  | 5 | 2 | 26 |
| P0C8M1 | Catalytic basic  | 9  | 2 | 6  | 5 | 2 | 24 |
| P0CAS2 | Catalytic basic  | 14 | 1 | 4  | 5 | 3 | 27 |
| P0CAS3 | Catalytic basic  | 14 | 1 | 5  | 6 | 3 | 29 |
| P0CAS4 | Catalytic basic  | 10 | 1 | 6  | 5 | 4 | 26 |
| P0CAS5 | Catalytic basic  | 13 | 0 | 5  | 8 | 2 | 28 |
| P0CAS6 | Catalytic basic  | 13 | 1 | 5  | 7 | 2 | 28 |
| P0CAS7 | Catalytic basic  | 13 | 0 | 9  | 5 | 3 | 30 |
| P0CG56 | Catalytic basic  | 12 | 1 | 6  | 6 | 3 | 28 |
| P0DKR5 | Catalytic basic  | 12 | 1 | 9  | 5 | 0 | 27 |
| P0DPS4 | Catalytic basic  | 8  | 1 | 11 | 3 | 2 | 25 |
| P0DQQ0 | Catalytic basic  | 11 | 2 | 8  | 4 | 2 | 27 |
| P0DUN1 | Catalytic basic  | 15 | 1 | 3  | 6 | 3 | 28 |
| P0DUN2 | Catalytic basic  | 9  | 0 | 8  | 6 | 2 | 25 |
| P11407 | Catalytic basic  | 5  | 1 | 9  | 6 | 4 | 25 |
| P14420 | Catalytic basic  | 12 | 0 | 9  | 5 | 0 | 26 |
| P14424 | Catalytic basic  | 10 | 0 | 8  | 5 | 4 | 27 |
| P20474 | Catalytic basic  | 7  | 1 | 7  | 8 | 6 | 29 |
| P24027 | Catalytic basic  | 11 | 1 | 5  | 7 | 2 | 26 |
| P31854 | Catalytic basic  | 7  | 1 | 14 | 3 | 1 | 26 |
| P51972 | Catalytic basic  | 10 | 1 | 6  | 7 | 1 | 25 |
| P59071 | Catalytic basic  | 7  | 1 | 7  | 8 | 6 | 29 |
| P59264 | Catalytic basic  | 9  | 1 | 9  | 6 | 2 | 27 |
| P59265 | Catalytic basic  | 11 | 2 | 9  | 4 | 2 | 28 |
| P62022 | Catalytic basic  | 13 | 0 | 6  | 6 | 3 | 28 |
| P62023 | Catalytic basic  | 13 | 0 | 6  | 6 | 3 | 28 |
| P81458 | Catalytic basic  | 8  | 1 | 10 | 5 | 3 | 27 |
| P84674 | Catalytic basic  | 11 | 0 | 5  | 6 | 5 | 27 |
| P86169 | Catalytic basic  | 13 | 0 | 6  | 6 | 3 | 28 |
| P86368 | Catalytic basic  | 10 | 1 | 6  | 6 | 5 | 28 |



|         |                 |    |   |    |    |   |    |
|---------|-----------------|----|---|----|----|---|----|
| P86803  | Catalytic basic | 6  | 2 | 11 | 4  | 3 | 26 |
| P86804  | Catalytic basic | 5  | 2 | 11 | 4  | 2 | 24 |
| P86805  | Catalytic basic | 13 | 0 | 8  | 5  | 3 | 29 |
| P86806  | Catalytic basic | 13 | 0 | 8  | 5  | 2 | 28 |
| Q02471  | Catalytic basic | 11 | 0 | 10 | 5  | 0 | 26 |
| Q02517  | Catalytic basic | 8  | 1 | 9  | 6  | 3 | 27 |
| Q10755  | Catalytic basic | 12 | 1 | 10 | 5  | 0 | 28 |
| Q1RP78  | Catalytic basic | 13 | 1 | 8  | 5  | 0 | 27 |
| Q1RP79  | Catalytic basic | 13 | 0 | 8  | 5  | 0 | 26 |
| Q1ZY03  | Catalytic basic | 13 | 1 | 6  | 4  | 3 | 27 |
| Q2YHJ2  | Catalytic basic | 7  | 1 | 9  | 6  | 5 | 28 |
| Q2YHJ7  | Catalytic basic | 8  | 0 | 7  | 5  | 5 | 25 |
| Q6EER2  | Catalytic basic | 12 | 0 | 7  | 4  | 4 | 27 |
| Q6EER3  | Catalytic basic | 8  | 1 | 9  | 5  | 2 | 25 |
| Q6EER5  | Catalytic basic | 11 | 0 | 7  | 4  | 4 | 26 |
| Q6EER6  | Catalytic basic | 9  | 1 | 9  | 4  | 3 | 26 |
| Q6H3C5  | Catalytic basic | 6  | 0 | 8  | 6  | 5 | 25 |
| Q71QE8  | Catalytic basic | 10 | 1 | 8  | 4  | 3 | 26 |
| Q805A2  | Catalytic basic | 9  | 1 | 9  | 4  | 4 | 27 |
| Q8JFG0  | Catalytic basic | 11 | 0 | 9  | 3  | 0 | 23 |
| Q8JIG0  | Catalytic basic | 8  | 1 | 8  | 7  | 3 | 27 |
| Q90W39  | Catalytic basic | 10 | 0 | 8  | 5  | 4 | 27 |
| Q90Y77  | Catalytic basic | 9  | 1 | 8  | 5  | 3 | 26 |
| P58464  | Catalytic basic | 13 | 2 | 6  | 8  | 0 | 29 |
| P45881  | Catalytic basic | 13 | 2 | 7  | 6  | 0 | 28 |
| P81165  | PLA2-like       | 13 | 1 | 7  | 5  | 0 | 26 |
| O57385  | PLA2-like       | 8  | 2 | 6  | 9  | 0 | 25 |
| P04361  | PLA2-like       | 10 | 0 | 11 | 9  | 0 | 30 |
| P49121  | PLA2-like       | 9  | 1 | 8  | 10 | 0 | 28 |
| Q9I834  | PLA2-like       | 8  | 3 | 7  | 11 | 0 | 29 |
| P82950  | PLA2-like       | 9  | 2 | 9  | 8  | 0 | 28 |
| P84776  | PLA2-like       | 11 | 1 | 8  | 7  | 1 | 28 |
| P82287  | PLA2-like       | 6  | 1 | 4  | 9  | 0 | 20 |
| P48650  | PLA2-like       | 8  | 2 | 9  | 4  | 2 | 25 |
| P17935  | PLA2-like       | 9  | 1 | 8  | 9  | 0 | 27 |
| Q6H3D7  | PLA2-like       | 9  | 1 | 6  | 6  | 2 | 24 |
| I6L8L6  | PLA2-like       | 8  | 2 | 6  | 10 | 0 | 26 |
| P0DTS8  | PLA2-like       | 7  | 1 | 4  | 7  | 0 | 19 |
| P58399  | PLA2-like       | 7  | 2 | 6  | 9  | 0 | 24 |
| Q9IAT9  | PLA2-like       | 7  | 1 | 7  | 11 | 0 | 26 |
| P82114  | PLA2-like       | 9  | 1 | 4  | 8  | 2 | 24 |
| 6MQD    | PLA2-like       | 7  | 2 | 7  | 10 | 0 | 26 |
| A0A1S5X | PLA2-like       | 10 | 2 | 5  | 8  | 0 | 25 |
| A8E2V9  | PLA2-like       | 13 | 2 | 4  | 9  | 0 | 28 |
| B5U6Y4  | PLA2-like       | 7  | 1 | 7  | 6  | 2 | 23 |
| C0HKC1  | PLA2-like       | 11 | 0 | 8  | 9  | 0 | 28 |
| C0HKC2  | PLA2-like       | 11 | 0 | 8  | 9  | 0 | 28 |
| F8QN50  | PLA2-like       | 8  | 1 | 8  | 9  | 0 | 26 |
| O42188  | PLA2-like       | 13 | 0 | 7  | 5  | 1 | 26 |
| P0C616  | PLA2-like       | 9  | 2 | 7  | 11 | 0 | 29 |
| P0DJJ8  | PLA2-like       | 12 | 2 | 6  | 9  | 0 | 29 |

|        |           |    |   |    |    |   |    |
|--------|-----------|----|---|----|----|---|----|
| P0DJJ9 | PLA2-like | 12 | 1 | 7  | 9  | 0 | 29 |
| P0DKU1 | PLA2-like | 15 | 1 | 5  | 5  | 2 | 28 |
| P0DMT1 | PLA2-like | 8  | 2 | 8  | 6  | 2 | 26 |
| P0DMT2 | PLA2-like | 9  | 1 | 8  | 5  | 2 | 25 |
| P0DMT3 | PLA2-like | 9  | 1 | 8  | 5  | 3 | 26 |
| P0DUN6 | PLA2-like | 9  | 2 | 2  | 6  | 1 | 20 |
| P0DUN7 | PLA2-like | 10 | 1 | 8  | 9  | 0 | 28 |
| P0DUP2 | PLA2-like | 12 | 1 | 7  | 9  | 0 | 29 |
| P22640 | PLA2-like | 8  | 2 | 5  | 9  | 1 | 25 |
| P70089 | PLA2-like | 9  | 0 | 5  | 9  | 1 | 24 |
| P70090 | PLA2-like | 8  | 2 | 4  | 10 | 1 | 25 |
| P80963 | PLA2-like | 8  | 0 | 9  | 6  | 0 | 23 |
| P86453 | PLA2-like | 6  | 1 | 8  | 10 | 0 | 25 |
| P86975 | PLA2-like | 6  | 1 | 5  | 11 | 0 | 23 |
| Q2PG81 | PLA2-like | 13 | 2 | 4  | 11 | 1 | 31 |
| Q2PWA3 | PLA2-like | 9  | 1 | 4  | 9  | 0 | 23 |
| Q2YHJ4 | PLA2-like | 7  | 2 | 5  | 8  | 1 | 23 |
| Q2YHJ8 | PLA2-like | 9  | 2 | 2  | 9  | 1 | 23 |
| Q2YHJ9 | PLA2-like | 9  | 1 | 3  | 11 | 1 | 25 |
| Q3HLQ4 | PLA2-like | 16 | 1 | 8  | 4  | 1 | 30 |
| Q6EAN6 | PLA2-like | 13 | 0 | 10 | 2  | 1 | 26 |
| Q6H3D1 | PLA2-like | 9  | 1 | 4  | 8  | 0 | 22 |
| Q6H3D2 | PLA2-like | 10 | 2 | 5  | 10 | 0 | 27 |
| Q6H3D3 | PLA2-like | 9  | 2 | 4  | 12 | 0 | 27 |
| Q6H3D4 | PLA2-like | 8  | 2 | 4  | 10 | 1 | 25 |
| Q6H3D5 | PLA2-like | 9  | 2 | 4  | 11 | 0 | 26 |
| Q6H3D6 | PLA2-like | 16 | 2 | 5  | 5  | 0 | 28 |
| Q6JK69 | PLA2-like | 9  | 2 | 5  | 7  | 0 | 23 |
| Q8UVU7 | PLA2-like | 10 | 0 | 6  | 9  | 0 | 25 |
| Q8UVZ7 | PLA2-like | 10 | 1 | 7  | 8  | 0 | 26 |
| Q92152 | PLA2-like | 11 | 1 | 3  | 9  | 0 | 24 |
| Q9PVE3 | PLA2-like | 10 | 2 | 6  | 8  | 0 | 26 |
| Q9PVF3 | PLA2-like | 10 | 1 | 4  | 9  | 0 | 24 |
| Q9PVF4 | PLA2-like | 8  | 1 | 7  | 8  | 1 | 25 |

## References

1. Fraczekiewicz, R. & Braun, W. Exact and Efficient Analytical Calculation of the Accessible Surface Areas and Their Gradients for Macromolecules. *J Comput Chem* **19**, 319333 (3193).
2. Magro, A. J., Soares, A. M., Giglio, J. R. & Fontes, M. R. M. Crystal structures of BnSP-7 and BnSP-6, two Lys49-phospholipases A2: quaternary structure and inhibition mechanism insights. *Biochem Biophys Res Commun* **311**, 713–720 (2003).
3. Dos Santos, J. I. *et al.* Structural, functional, and bioinformatics studies reveal a new snake venom homologue phospholipase A2 class. *Proteins: Structure, Function and Bioinformatics* **79**, 61–78 (2011).
4. Zhao, K., Song, S., Lin, Z. & Znou, Y. Structure of a Basic Phospholipase A2 from Agkistrodon halys Pallas at 2.13 Å Resolution. *urn:issn:0907-4449* **54**, 510–521 (1998).
5. de Lima, L. F. G., Borges, R. J., Viviescas, M. A., Fernandes, C. A. H. & Fontes, M. R. M. Structural studies with BnSP-7 reveal an atypical oligomeric conformation compared to phospholipases A2-like toxins. *Biochimie* **142**, 11–21 (2017).
6. Salvador, G. H. M., dos Santos, J. I., Lomonte, B. & Fontes, M. R. M. Crystal structure of a phospholipase A2 from Bothrops asper venom: Insights into a new putative “myotoxic cluster”. *Biochimie* **133**, 95–102 (2017).
7. Magro, A. J., Takeda, A. A. S., Soares, A. M. & Fontes, M. R. M. Structure of BthA-I complexed with p-bromophenacyl bromide: possible correlations with lack of pharmacological activity. *urn:issn:0907-4449* **61**, 1670–1677 (2005).
8. Murakami, M. T. *et al.* Inhibition of myotoxic activity of Bothrops asper myotoxin II by the anti-trypanosomal drug suramin. *J Mol Biol* **350**, 416–26 (2005).
9. Pan, Y. H., Epstein, T. M., Jain, M. K. & Bahnson, B. J. Five coplanar anion binding sites on one face of phospholipase A2: Relationship to interface binding. *Biochemistry* **40**, 609–617 (2001).

10. White, S. P., Scott, D. L., Otwinowski, Z., Gelb, M. H. & Sigler, P. B. Crystal structure of cobra-venom phospholipase A2 in a complex with a transition-state analogue. *Science* (1979) **250**, 1560–1563 (1990).
11. Scott, D. L. *et al.* Structures of Free and Inhibited Human Secretory Phospholipase A2 from Inflammatory Exudate. *Science* (1979) **254**, 1007–1010 (1991).
12. Scott, D. L., Otwinowski, Z., Gelb, M. H. & Sigler, P. B. Crystal structure of bee-venom phospholipase A2 in a complex with a transition-state analogue. *Science* (1979) **250**, 1563–1566 (1990).
13. Thunnissen, M. M. G. M. *et al.* X-ray structure of phospholipase A2 complexed with a substrate-derived inhibitor. *Nature* 1990 **347**:6294 **347**, 689–691 (1990).
14. RCSB PDB - 4RFP: Crystal structure of a acidic PLA2 from *Trimeresurus stejnegeri* venom. <https://www.rcsb.org/structure/4RFP>.
15. Banumathi, S. *et al.* Structure of the neurotoxic complex vipoxin at 1.4 Å resolution. *Acta Crystallogr D Biol Crystallogr* **57**, 1552–1559 (2001).
16. Jasti, J., Paramasivam, M., Srinivasan, A. & Singh, T. P. Structure of an acidic phospholipase A2 from Indian saw-scaled viper (*Echis carinatus*) at 2.6 Å resolution reveals a novel intermolecular interaction. *urn:issn:0907-4449* **60**, 66–72 (2003).
17. Zhao, K., Zhou, Y. & Lin, Z. Structure of basic phospholipase A2 from *Agkistrodon halys* Pallas: Implications for its association, hemolytic and anticoagulant activities. *Toxicon* **38**, 901–916 (2000).
18. Gopalan, G., Thwin, M. M., Gopalakrishnakone, P. & Swaminathan, K. Structural and pharmacological comparison of daboia toxin from *Daboia russelli siamensis* with viperotoxin F and vipoxin from other vipers. *Acta Crystallogr D Biol Crystallogr* **63**, 722–729 (2007).
19. Matsui, T. *et al.* SDS-induced oligomerization of Lys49-phospholipase A2 from snake venom. *Scientific Reports* 2019 9:1 **9**, 1–8 (2019).
20. Watanabe, L., Soares, A. M., Ward, R. J., Fontes, M. R. M. & Arni, R. K. Structural insights for fatty acid binding in a Lys49-phospholipase A2: crystal structure of myotoxin II from *Bothrops moojeni* complexed with stearic acid. *Biochimie* **87**, 161–167 (2005).
21. Murakami, M. T., Melo, C. C., Angulo, Y., Lomonte, B. & Arni, R. K. Structure of myotoxin II, a catalytically inactive Lys49 phospholipase A2 homologue from *Atropoides nummifer* venom. *urn:issn:1744-3091* **62**, 423–426 (2006).
22. dos Santos, J. I., Soares, A. M. & Fontes, M. R. M. Comparative structural studies on Lys49-phospholipases A2 from *Bothrops* genus reveal their myotoxic site. *J Struct Biol* **167**, 106–116 (2009).
23. Jumper, J. *et al.* Highly accurate protein structure prediction with AlphaFold. *Nature* 2021 596:7873 **596**, 583–589 (2021).
24. Balasubramanya, R., Chandra, V., Kaur, P. & Singh, T. P. Crystal structure of the complex of the secretory phospholipase A2 from *Daboia russelli pulchella* with an endogenic indole derivative, 2-carbamoylmethyl-5-propyl-octahydro-indol-7-yl-acetic acid at 1.8 Å resolution. *Biochimica et Biophysica Acta (BBA) - Proteins and Proteomics* **1752**, 177–185 (2005).
25. Arni, R. K. *et al.* Crystal Structure of Myotoxin II, a Monomeric Lys49-Phospholipase A2 Homologue Isolated from the Venom of *Cerrophidion* (*Bothrops*) *godmani*. *Arch Biochem Biophys* **366**, 177–182 (1999).
26. Waterhouse, A. M., Procter, J. B., Martin, D. M. A., Clamp, M. & Barton, G. J. Jalview Version 2—a multiple sequence alignment editor and analysis workbench. *Bioinformatics* **25**, 1189–1191 (2009).
